# Supplementary material
Source: PubMed Central journal article supplement (PMC7860101)
Supplement: ao0c05186_si_001.pdf [file ao0c05186_si_001.pdf]

# Sustainable Biocomposites from Recycled Bale Wrap Plastic and Agave Fiber:

## Processing and Properties Evaluation

Iftekhhar H. Chowdhury<sup>1,2</sup>, Mohamed A. Abdelwahab<sup>2,†</sup>, Manjusri Misra<sup>1,2\*</sup>, Amar K. Mohanty<sup>1,2</sup>

<sup>1</sup>School of Engineering, University of Guelph, Thornbrough Building, Guelph, Ontario, N1G 2W1, Canada

<sup>2</sup>Bioproducts Discovery and Development Centre, Department of Plant Agriculture, Crop Science Building, University of Guelph, 50 Stone Road East, Guelph, Ontario, N1G 2W1, Canada

\*Correspondence to M. Misra, Email: mmisra@uoguelph.ca

†On leave from Department of Chemistry, Faculty of Science, Tanta University, Tanta, 31527, Egypt

## Supporting Information

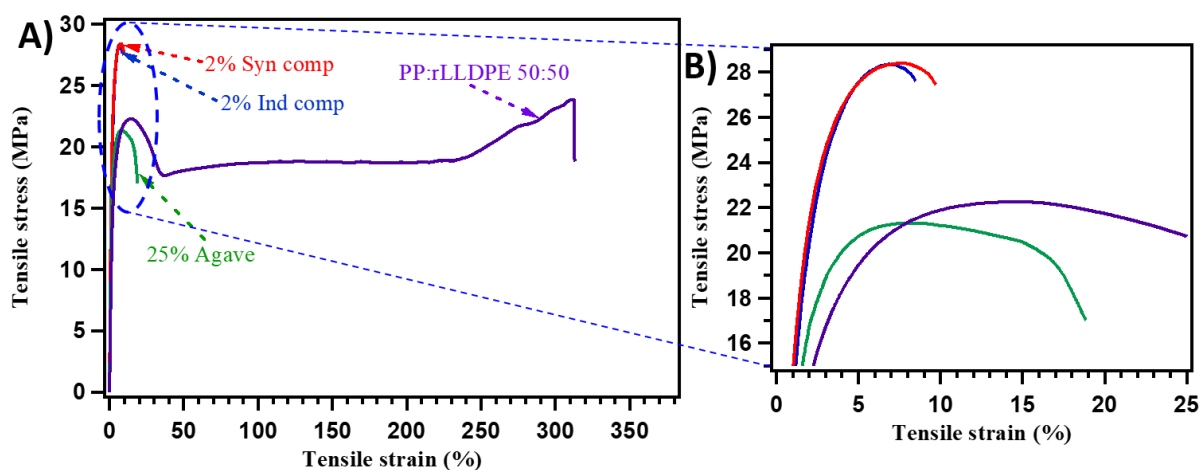

Figure S1: A) Stress-strain curve of PP:rLLDPE (50:50), 25% agave and the composite prepared with 2% synthesized compatibilizer (Syn Comp) and 2% industrial compatibilizer (Ind Comp) and B) zoom on stress-strain curve.
